# Supplementary material for: Lipid phosphate phosphatase activity regulates dispersal and bilateral sorting of embryonic germ cells in Drosophila
Source: Oxford University Press journal article supplement (doi:10.1242/dev.046110), 2010-04-30
Supplement: dev046110-sup-046110figs1.pdf [file dev046110-sup-046110figs1.pdf]

**A**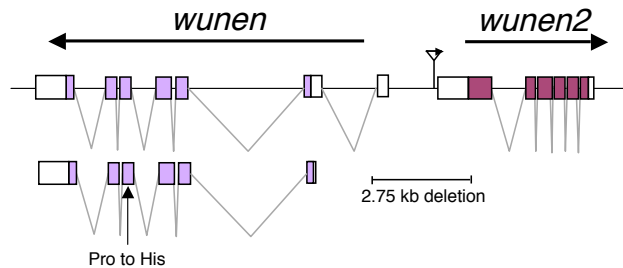**B**

↓

|                     |   |   |   |   |   |   |   |   |   |   |   |   |   |   |   |   |   |   |   |   |
|---------------------|---|---|---|---|---|---|---|---|---|---|---|---|---|---|---|---|---|---|---|---|
| <i>wunen</i> [Fly]  | L | K | E | M | R | L | S | F | P | S | G | H | S | S | F | T | F | F | A | M |
| <i>wunen2</i> [Fly] | L | K | D | M | R | L | S | F | P | S | G | H | A | S | F | A | C | Y | S | M |
| LPP1 [Human]        | V | K | E | G | R | L | S | F | Y | S | G | H | S | S | F | S | M | Y | C | M |
| LPP2 [Human]        | V | T | E | A | R | L | S | F | Y | S | G | H | S | S | F | G | M | Y | C | M |
| LPP3 [Human]        | V | Q | E | A | R | K | S | F | F | S | G | H | A | S | F | S | M | Y | T | M |
| CG11426 [Fly]       | V | R | Q | A | R | L | S | F | P | S | G | H | S | S | L | A | F | Y | A | M |
| CG11438 [Fly]       | F | K | E | L | Y | Q | S | F | P | S | G | H | A | S | M | A | M | Y | A | M |
| CG11440 [Fly]       | I | R | E | L | H | V | S | F | P | S | A | H | S | S | L | S | F | Y | S | M |
| CG11425 [Fly]       | I | R | D | V | N | V | S | F | P | S | G | H | S | A | M | A | F | Y | G | L |
| CG11437 [Fly]       | L | A | L | V | R | H | S | F | P | S | G | F | V | S | T | C | Y | A | M |   |
| CG12746 [Fly]       | I | N | E | G | R | K | S | F | P | S | G | H | S | S | F | A | F | A | S | F |
